# Supplementary material
Source: Springer Nature journal article supplement (https://www.springermedizin.de/resource/supplementary/12885_2012_3840_MOESM3_ESM.pdf/9464596)
Supplement: MOESM3 [file 9464596]

# Supplemental Figure 3

## A

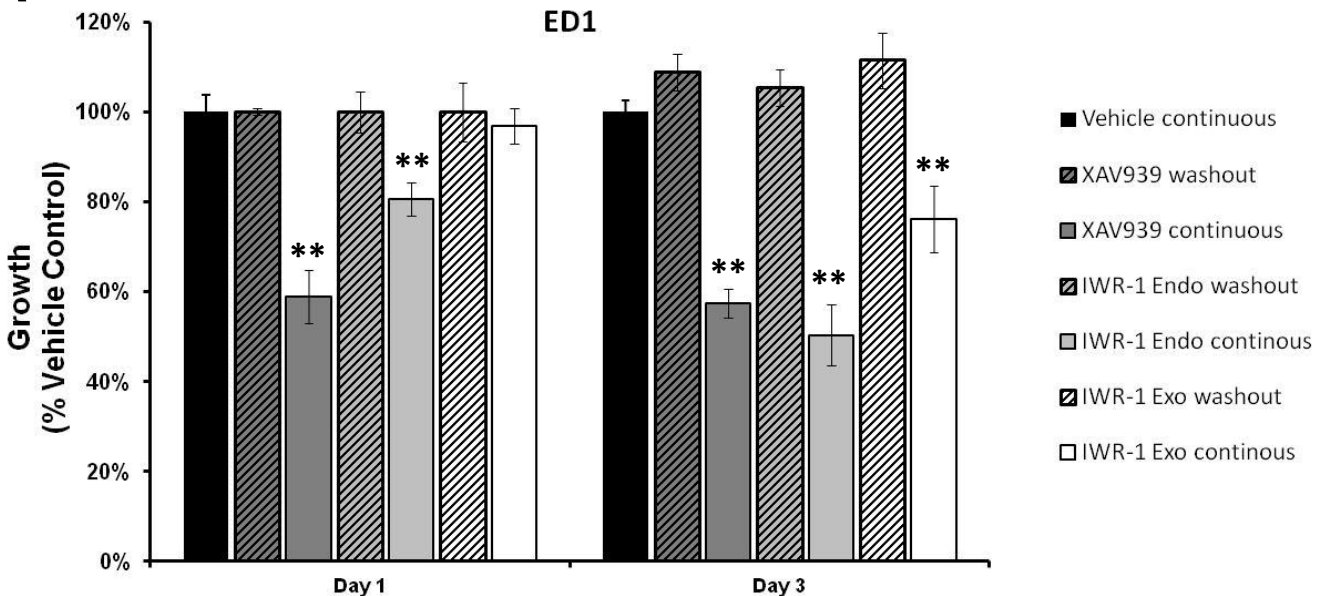

## B

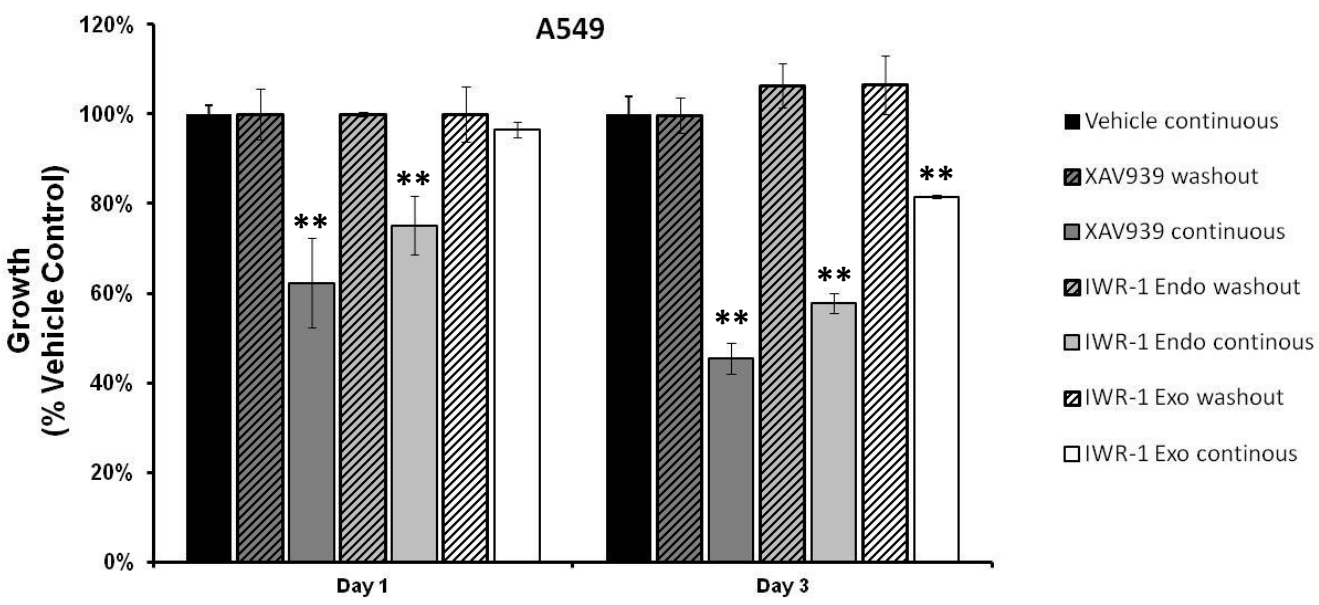

### Supplemental Figure 3

(a) ED1 and (b) A549 cells were treated for 3 days with vehicle or Tnks inhibitor (10 $\mu$ M). This led to growth inhibition as seen in figure 2 (data not shown). Cells were then trypsinized and replated at equal cell density for another 3 day treatment with either the respective drug (continuous treatment) or washout. Cell growth was measured at days 1 and 3 by luminescent cell viability assay. Error bars represent mean +/- S.D. of two experiments in triplicate. Comparisons were made between each treatment or washout group and the continuous vehicle treatment control. (\*\*  $P < 0.01$ )
